# Supplementary material for: The effects of time frames on self-report
Source: PubMed Central journal article supplement (PMC6084942; doi:10.1371/journal.pone.0201655), 2018-08-09
Supplement: pone.0201655.s001.pdf [file pone.0201655.s001.pdf]

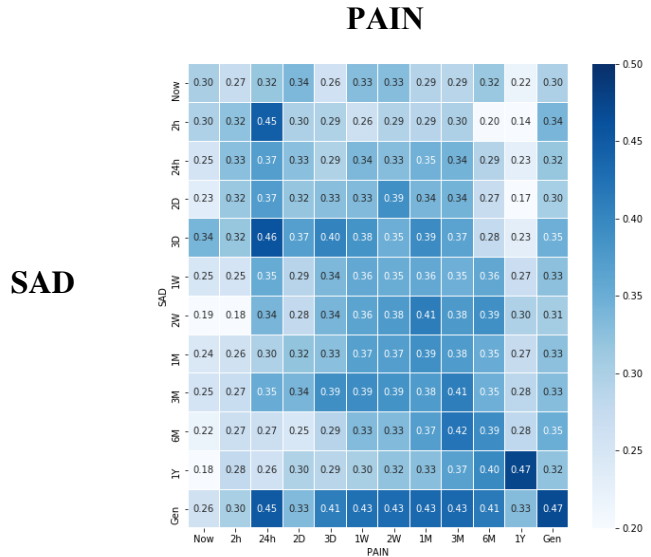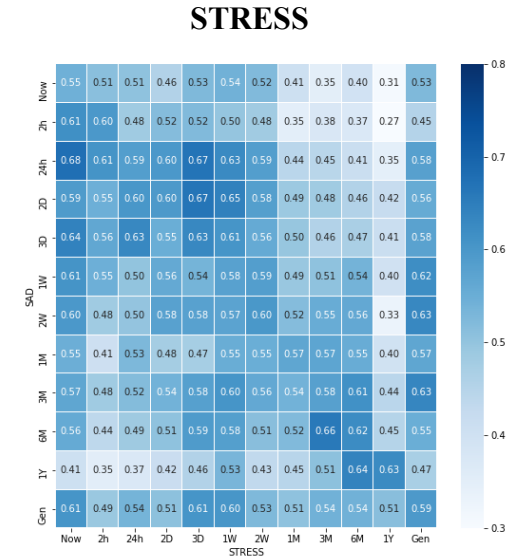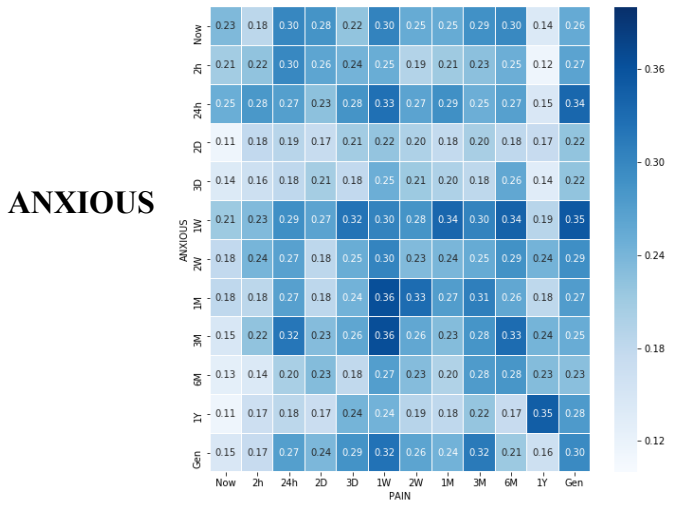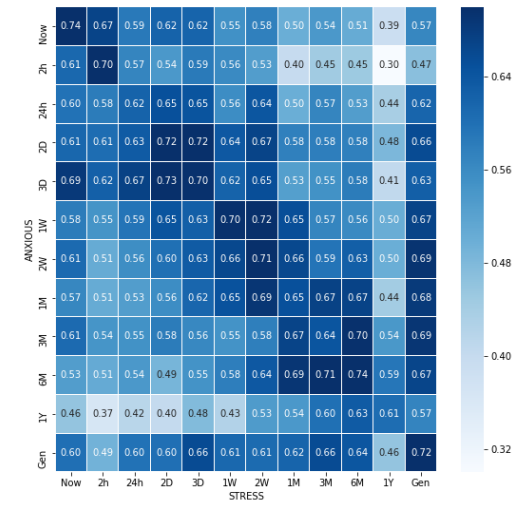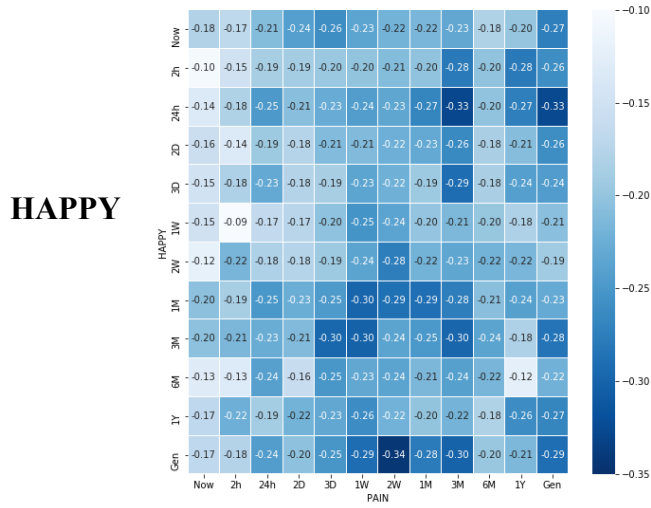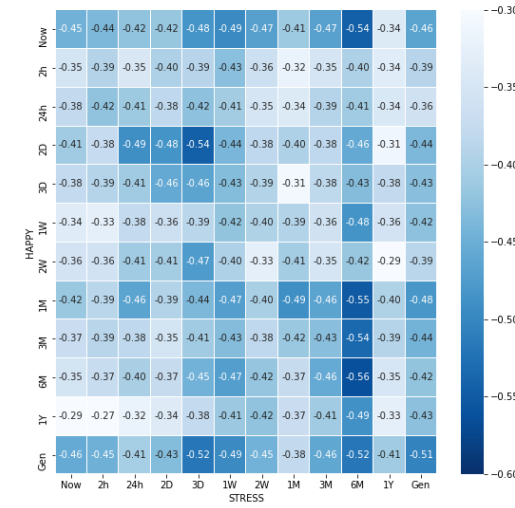

**S1 Fig. Correlation between symptoms (pain/stress) and emotions (sad/anxious/happy) for response levels across all time frames.**
