# Supplementary material for: The effects of time frames on self-report
Source: PubMed Central journal article supplement (PMC6084942; doi:10.1371/journal.pone.0201655), 2018-08-09
Supplement: pone.0201655.s002.pdf [file pone.0201655.s002.pdf]

**S1 Table. Comparison of polynomial growth models for response times data.** Compared models include no change (Model 1), linear change (Model 2), and quadratic change models (Model 3).

|                                     | Happy    |          |          | Calm     |                   |          |
|-------------------------------------|----------|----------|----------|----------|-------------------|----------|
|                                     | Model 1  | Model 2  | Model 3  | Model 1  | Model 2           | Model 3  |
| Fixed effects:                      |          |          |          |          |                   |          |
| Intercept                           | 0.798*** | 0.747*** | 0.739*** | 0.802*** | 0.776***          | 0.764*** |
| Time frame (linear)                 |          | 0.010*** | 0.016    |          | 0.005*            | 0.014    |
| Time frame <sup>2</sup> (quadratic) |          |          | -0.001   |          |                   | -0.001   |
| Variance components:                |          |          |          |          |                   |          |
| Level 1 Residual                    | 0.170*** | 0.167*** | 0.167*** | 0.171*** | 0.170***          | 0.169*** |
| Level 2 Intercept                   | 0.086*** | 0.077*** | 0.078*** | 0.068*** | 0.055***          | 0.053*** |
| Time frame                          |          | 0.000    | 0.001    |          | 0.000             | 0.001    |
| Time frame <sup>2</sup>             |          |          | 0.000    |          |                   | 0.000    |
| Goodness-of-fit                     |          |          |          |          |                   |          |
| BIC                                 | 3928     | 3932     | 3964     | 3861     | 3878              | 3909     |
| -2*log likelihood                   | 3904     | 3884     | 3883     | 3837     | 3829              | 3829     |
| Likelihood ratio test $\chi^2$      |          | 19.94*** | 0.19     |          | 7.80 <sup>a</sup> | 0.90     |

Note. Covariance components are not reported.  $\chi^2$  for comparisons Model 2 vs. Model 1 ( $df=3$ ) and Model 3 vs. Model 2 ( $df=4$ ).

<sup>a</sup> $p < .10$ , \*  $p < .05$ , \*\*  $p < .01$ , \*\*\*  $p < .001$

|                                     | Excited  |          |                    | Sad      |          |          |
|-------------------------------------|----------|----------|--------------------|----------|----------|----------|
|                                     | Model 1  | Model 2  | Model 3            | Model 1  | Model 2  | Model 3  |
| Fixed effects:                      |          |          |                    |          |          |          |
| Intercept                           | 0.820*** | 0.780*** | 0.758***           | 0.756*** | 0.677*** | 0.651*** |
| Time frame (linear)                 |          | 0.008**  | 0.023*             |          | 0.016*** | 0.033**  |
| Time frame <sup>2</sup> (quadratic) |          |          | -0.001             |          |          | -0.002   |
| Variance components:                |          |          |                    |          |          |          |
| Level 1 Residual                    | 0.170*** | 0.168*** | 0.164***           | 0.182*** | 0.174*** | 0.169*** |
| Level 2 Intercept                   | 0.086*** | 0.090*** | 0.094***           | 0.075*** | 0.074*** | 0.053*** |
| Time frame                          |          | 0.000    | 0.005 <sup>a</sup> |          | 0.000**  | 0.002    |
| Time frame <sup>2</sup>             |          |          | 0.000              |          |          | 0.000    |
| Goodness-of-fit                     |          |          |                    |          |          |          |
| BIC                                 | 3901     | 3915     | 3941               | 4086     | 4061     | 4075     |
| -2*log likelihood                   | 3877     | 3867     | 3861               | 4062     | 4013     | 3995     |
| Likelihood ratio test $\chi^2$      |          | 10.37*   | 5.82               |          | 48.47*** | 17.94**  |

Note. Covariance components are not reported.  $\chi^2$  for comparisons Model 2 vs. Model 1 ( $df=3$ ) and Model 3 vs. Model 2 ( $df=4$ ).

<sup>a</sup> $p < .10$ , \*  $p < .05$ , \*\*  $p < .01$ , \*\*\*  $p < .001$

|                                     | <b>Anxious</b> |          |          | <b>Angry</b> |          |          |
|-------------------------------------|----------------|----------|----------|--------------|----------|----------|
|                                     | Model 1        | Model 2  | Model 3  | Model 1      | Model 2  | Model 3  |
| Fixed effects:                      |                |          |          |              |          |          |
| Intercept                           | 0.743***       | 0.700*** | 0.677*** | 0.748***     | 0.673*** | 0.640*** |
| Time frame (linear)                 |                | 0.009**  | 0.024*   |              | 0.015*** | 0.037**  |
| Time frame <sup>2</sup> (quadratic) |                |          | -0.002   |              |          | -0.002*  |
| Variance components:                |                |          |          |              |          |          |
| Level 1 Residual                    | 0.160***       | 0.158*** | 0.157*** | 0.179***     | 0.175*** | 0.171*** |
| Level 2 Intercept                   | 0.087***       | 0.095*** | 0.094*** | 0.083***     | 0.073*** | 0.058*** |
| Time frame                          |                | 0.000    | 0.001    |              | 0.000    | 0.002    |
| Time frame <sup>2</sup>             |                |          | 0.000    |              |          | 0.000    |
| Goodness-of-fit                     |                |          |          |              |          |          |
| BIC                                 | 3788           | 3798     | 3826     | 4077         | 4061     | 4082     |
| -2*log likelihood                   | 3764           | 3750     | 3746     | 4053         | 4013     | 4002     |
| Likelihood ratio test $\chi^2$      |                | 13.92**  | 3.81     |              | 40.41*** | 11.27*   |

Note. Covariance components are not reported.  $\chi^2$  for comparisons Model 2 vs. Model 1 ( $df=3$ ) and Model 3 vs. Model 2 ( $df=4$ ).

<sup>a</sup> $p < .10$ , \*  $p < .05$ , \*\*  $p < .01$ , \*\*\*  $p < .001$

|                                     | <b>Pain</b> |          |          | <b>Stress</b> |          |          |
|-------------------------------------|-------------|----------|----------|---------------|----------|----------|
|                                     | Model 1     | Model 2  | Model 3  | Model 1       | Model 2  | Model 3  |
| Fixed effects:                      |             |          |          |               |          |          |
| Intercept                           | 0.712***    | 0.657*** | 0.649*** | 0.768***      | 0.725*** | 0.694*** |
| Time frame (linear)                 |             | 0.011*** | 0.016    |               | 0.009*** | 0.029**  |
| Time frame <sup>2</sup> (quadratic) |             |          | 0.000    |               |          | -0.002*  |
| Variance components:                |             |          |          |               |          |          |
| Level 1 Residual                    | 0.174***    | 0.170*** | 0.167*** | 0.162***      | 0.160*** | 0.158*** |
| Level 2 Intercept                   | 0.064***    | 0.047*** | 0.034**  | 0.075***      | 0.071*** | 0.066*** |
| Time frame                          |             | 0.000    | 0.002    |               | 0.000    | 0.001    |
| Time frame <sup>2</sup>             |             |          | 0.000    |               |          | 0.000    |
| Goodness-of-fit                     |             |          |          |               |          |          |
| BIC                                 | 3856        | 3850     | 3875     | 3749          | 3758     | 3784     |
| -2*log likelihood                   | -3832       | -3802    | -3795    | -3725         | -3710    | -3704    |
| Likelihood ratio test $\chi^2$      |             | 30.61*** | 6.62     |               | 14.74**  | 6.28     |

Note. Covariance components are not reported.  $\chi^2$  for comparisons Model 2 vs. Model 1 ( $df=3$ ) and Model 3 vs. Model 2 ( $df=4$ ).

<sup>a</sup> $p < .10$ , \*  $p < .05$ , \*\*  $p < .01$ , \*\*\*  $p < .001$
