# Supplementary material for: The effects of time frames on self-report
Source: PubMed Central journal article supplement (PMC6084942; doi:10.1371/journal.pone.0201655), 2018-08-09
Supplement: pone.0201655.s003.pdf [file pone.0201655.s003.pdf]

**S2 Table. Comparison of polynomial growth models for response levels data.** Compared models include no change (Model 1), linear change (Model 2), and quadratic change models (Model 3).

|                                     | Happy    |           |          | Calm     |           |           |
|-------------------------------------|----------|-----------|----------|----------|-----------|-----------|
|                                     | Model 1  | Model 2   | Model 3  | Model 1  | Model 2   | Model 3   |
| Fixed effects:                      |          |           |          |          |           |           |
| Intercept                           | 3.065*** | 2.992***  | 2.966*** | 3.217*** | 3.388***  | 3.481***  |
| Time frame (linear)                 |          | 0.015**   | 0.032*   |          | -0.035*** | -0.096*** |
| Time frame <sup>2</sup> (quadratic) |          |           | -0.002   |          |           | 0.006***  |
| Variance components:                |          |           |          |          |           |           |
| Level 1 Residual                    | 0.317*** | 0.269***  | 0.263*** | 0.391*** | 0.316***  | 0.301***  |
| Level 2 Intercept                   | 0.895*** | 1.144***  | 1.171*** | 0.756*** | 0.992***  | 1.023***  |
| Time frame                          |          | 0.004***  | 0.013*** |          | 0.006***  | 0.021**   |
| Time frame <sup>2</sup>             |          |           | 0.000*** |          |           | 0.000*    |
| Goodness-of-fit                     |          |           |          |          |           |           |
| BIC                                 | 6524     | 6410      | 6436     | 6987     | 6791      | 6789      |
| -2*log likelihood                   | 6500     | 6361      | 6356     | 6963     | 6742      | 6709      |
| Likelihood ratio test $\chi^2$      |          | 138.85*** | 5.25     |          | 220.65*** | 33.67***  |

*Note.* Covariance components are not reported.  $\chi^2$  for comparisons Model 2 vs. Model 1 ( $df=3$ ) and Model 3 vs. Model 2 ( $df=4$ ).

\*  $p < .05$ , \*\*  $p < .01$ , \*\*\*  $p < .001$

|                                     | Excited  |           |          | Sad      |           |           |
|-------------------------------------|----------|-----------|----------|----------|-----------|-----------|
|                                     | Model 1  | Model 2   | Model 3  | Model 1  | Model 2   | Model 3   |
| Fixed effects:                      |          |           |          |          |           |           |
| Intercept                           | 2.381*** | 2.145***  | 2.084*** | 1.835*** | 1.446***  | 1.494***  |
| Time frame (linear)                 |          | 0.048***  | 0.085*** |          | 0.077***  | 0.045***  |
| Time frame <sup>2</sup> (quadratic) |          |           | -0.004*  |          |           | 0.003*    |
| Variance components:                |          |           |          |          |           |           |
| Level 1 Residual                    | 0.421*** | 0.314***  | 0.289*** | 0.357*** | 0.233***  | 0.206***  |
| Level 2 Intercept                   | 0.758*** | 1.143***  | 1.080*** | 0.672*** | 0.707***  | 0.577***  |
| Time frame                          |          | 0.007***  | 0.029*** |          | 0.005***  | 0.025***  |
| Time frame <sup>2</sup>             |          |           | 0.000*** |          |           | 0.000***  |
| Goodness-of-fit                     |          |           |          |          |           |           |
| BIC                                 | 7138     | 6791      | 6782     | 6737     | 6037      | 5965      |
| -2*log likelihood                   | 7114     | 6743      | 6702     | -6713    | -5989     | -5884     |
| Likelihood ratio test $\chi^2$      |          | 370.88*** | 41.72*** |          | 724.46*** | 104.30*** |

*Note.* Covariance components are not reported.  $\chi^2$  for comparisons Model 2 vs. Model 1 ( $df=3$ ) and Model 3 vs. Model 2 ( $df=4$ ).

\*  $p < .05$ , \*\*  $p < .01$ , \*\*\*  $p < .001$

|                                     | <b>Anxious</b> |           |          | <b>Angry</b> |           |           |
|-------------------------------------|----------------|-----------|----------|--------------|-----------|-----------|
|                                     | Model 1        | Model 2   | Model 3  | Model 1      | Model 2   | Model 3   |
| Fixed effects:                      |                |           |          |              |           |           |
| Intercept                           | 2.189***       | 1.782***  | 1.713*** | 1.624***     | 1.286***  | 1.301***  |
| Time frame (linear)                 |                | 0.081***  | 0.126*** |              | 0.068***  | 0.060***  |
| Time frame <sup>2</sup> (quadratic) |                |           | -0.004** |              |           | 0.001     |
| Variance components:                |                |           |          |              |           |           |
| Level 1 Residual                    | 0.476***       | 0.329***  | 0.299*** | 0.329***     | 0.225***  | 0.191***  |
| Level 2 Intercept                   | 0.800***       | 0.853***  | 0.695*** | 0.368***     | 0.419***  | 0.378***  |
| Time frame                          |                | 0.007***  | 0.034*** |              | 0.005***  | 0.038***  |
| Time frame <sup>2</sup>             |                |           | 0.000*** |              |           | 0.000***  |
| Goodness-of-fit                     |                |           |          |              |           |           |
| BIC                                 | 7568           | 6984      | 6945     | 6271         | 5684      | 5608      |
| -2*log likelihood                   | -7544          | -6936     | -6865    | 6247         | -5636     | -5528     |
| Likelihood ratio test $\chi^2$      |                | 608.15*** | 71.32*** |              | 610.33*** | 108.15*** |

Note. Covariance components are not reported.  $\chi^2$  for comparisons Model 2 vs. Model 1 ( $df=3$ ) and Model 3 vs. Model 2 ( $df=4$ ).

\*  $p < .05$ , \*\*  $p < .01$ , \*\*\*  $p < .001$

|                                     | <b>Pain</b> |           |          | <b>Stress</b> |           |          |
|-------------------------------------|-------------|-----------|----------|---------------|-----------|----------|
|                                     | Model 1     | Model 2   | Model 3  | Model 1       | Model 2   | Model 3  |
| Fixed effects:                      |             |           |          |               |           |          |
| Intercept                           | 1.751***    | 1.501***  | 1.496*** | 2.358***      | 1.869***  | 1.843*** |
| Time frame (linear)                 |             | 0.049***  | 0.051*** |               | 0.098***  | 0.114*** |
| Time frame <sup>2</sup> (quadratic) |             |           | 0.000    |               |           | -0.002   |
| Variance components:                |             |           |          |               |           |          |
| Level 1 Residual                    | 0.294***    | 0.201***  | 0.178*** | 0.563***      | 0.369***  | 0.338*** |
| Level 2 Intercept                   | 0.604***    | 0.721***  | 0.597*** | 0.750***      | 0.917***  | 0.758*** |
| Time frame                          |             | 0.006***  | 0.022*** |               | 0.008***  | 0.030*** |
| Time frame <sup>2</sup>             |             |           | 0.000*** |               |           | 0.000*** |
| Goodness-of-fit                     |             |           |          |               |           |          |
| BIC                                 | 6098        | 5619      | 5560     | 7943          | 7251      | 7227     |
| -2*log likelihood                   | 6074        | 5571      | 5479     | 7919          | 7202      | 7147     |
| Likelihood ratio test $\chi^2$      |             | 503.74*** | 91.15*** |               | 716.45*** | 55.22*** |

Note. Covariance components are not reported.  $\chi^2$  for comparisons Model 2 vs. Model 1 ( $df=3$ ) and Model 3 vs. Model 2 ( $df=4$ ).

\*  $p < .05$ , \*\*  $p < .01$ , \*\*\*  $p < .001$
